# Supplementary material for: An ALP enzyme-based electrochemical biosensor coated with signal-amplifying BaTiO3 nanoparticles for the detection of an antiviral drug in human blood serum
Source: Royal Society of Chemistry journal article supplement (doi:10.1039/d3na00839h), 2023-12-19
Supplement: d3na00839h1.pdf [file d3na00839h1.pdf]

Supplementary data:

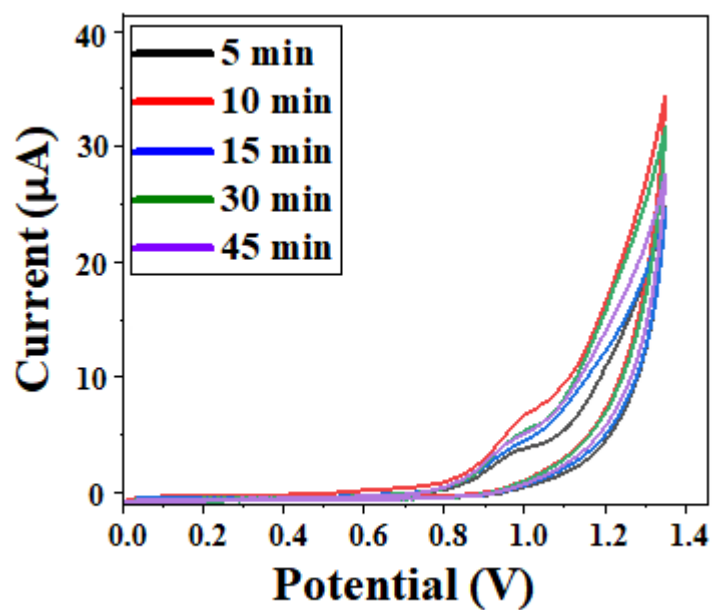

Fig. S1: CV for optimization of nanoparticles amount to transform PGE.

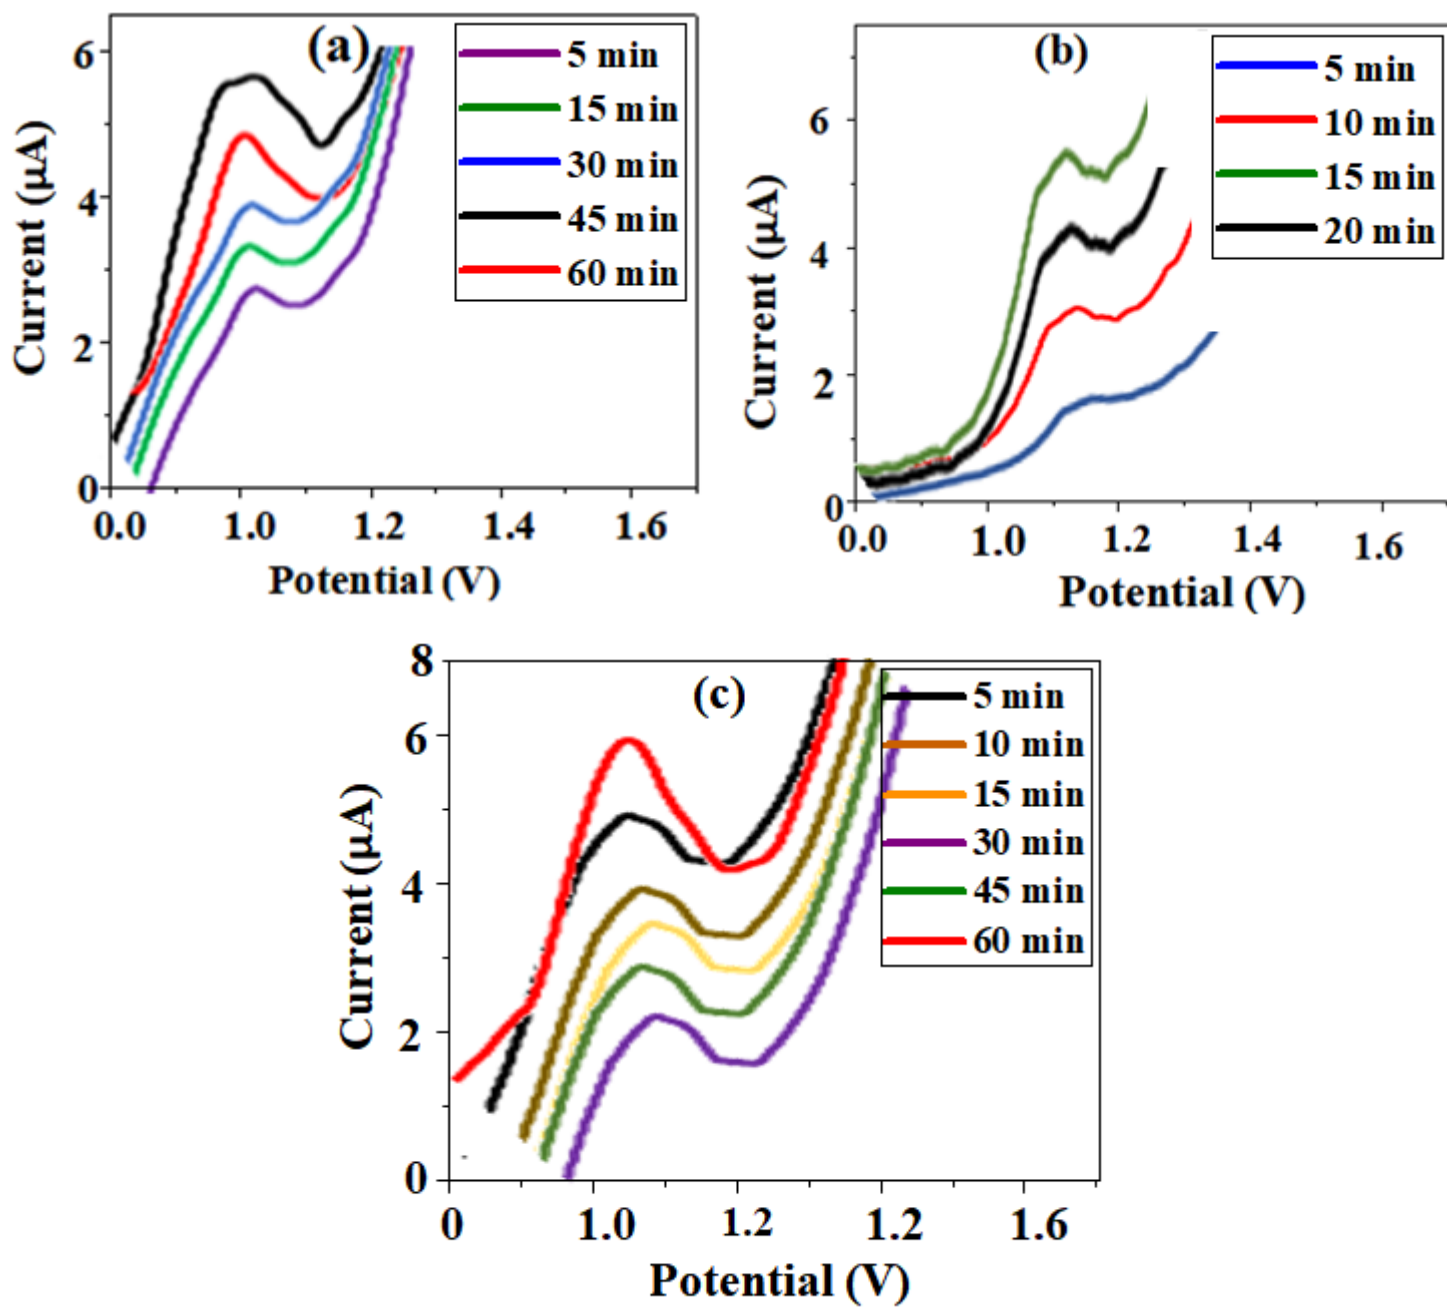

**Fig. S2:** DPV for optimizations (a) Electrode modification time with nanoparticles, (b) Electrode modification time with nanoparticles and enzymes, (c) Time incubation for same concentration of drug.
